# Supplementary material for: Stretching the Habitat Envelope: Insectivorous Bat Guilds Can Use Rubber Plantations, but Need Understorey Vegetation and Forest Buffers
Source: Frontiers journal article supplement (doi:10.3389/fcosc.2021.751694), 2021-12-09
Supplement: Table_1.pdf [file Table_1.pdf]

## Supplementary Material

**Table S1.** Average activity of identified bat species (bat passes/hour) by habitat type (forests, rubber, teak, and settlements) in different guilds analysed from our acoustic data.

| Insectivorous bat species                              | Forests | Rubber plantations | Teak plantations | Settlements |
|--------------------------------------------------------|---------|--------------------|------------------|-------------|
| <b>Open-Space Aerial (OSA)</b>                         |         |                    |                  |             |
| <i>Tadarida aegyptiaca</i> <sup>1</sup>                | 0.6     | 0.78               | 1.2              | 2.8         |
| <i>Tadarida teniotis</i> <sup>1</sup>                  | 0.97    | 0.3                | 0.9              | 1.9         |
| <i>Chaerephon plicatus</i> <sup>1</sup>                | 0       | 0                  | 2.8              | 5           |
| <i>Taphozous melanopogon</i> <sup>2</sup>              | 1.64    | 0.925              | 4.5              | 3.75        |
| <b>Edge-Space Aerial (ESA)</b>                         |         |                    |                  |             |
| <i>Pipistrellus ceylonicus</i> <sup>3</sup>            | 7.4     | 5.0                | 6.2              | 9.7         |
| <i>Pipistrellus</i> cf. <i>coromandra</i> <sup>3</sup> | 6.8     | 0.45               | 1.0              | 1.5         |
| <i>Pipistrellus</i> cf. <i>tenuis</i> <sup>3</sup>     | 1.6     | 4.2                | 0.9              | 1.5         |
| <i>Miniopterus fuliginosus</i> <sup>4</sup>            | 1.9     | 1.4                | 1.03             | 0           |
| <i>Miniopterus pusillus</i> <sup>4</sup>               | 2.6     | 2.4                | 1.6              | 5.5         |
| <b>Narrow-Space Flutter-Detecting (NSFD)</b>           |         |                    |                  |             |
| <i>Rhinolophus beddomei</i> <sup>5</sup>               | 1.5     | 0                  | 0                | 0           |
| <i>Rhinolophus rouxi</i> <sup>5</sup>                  | 1.65    | 0                  | 0.03             | 0           |
| <i>Rhinolophus indorouxii</i> <sup>5</sup>             | 3.8     | 0                  | 0                | 0           |
| <i>Rhinolophus lepidus</i> <sup>5</sup>                | 3.8     | 1.5                | 0.3              | 0           |

Bat families: <sup>1</sup>Molossidae, <sup>2</sup>Emballonuridae, <sup>3</sup>Vespertilionidae, <sup>4</sup>Miniopteridae, <sup>5</sup>Rhinolophidae.

For the analyses of average activity presented in the Results section of the main article, activity of species listed in the table above, and those marked with \* below, was included in the guild-wise totals used. Species marked with ^ were recorded only from roosts but not detected in foraging locations.

Activity of the following groups is not reported in Table S1.

OSA: Unidentified *Taphozous* sp.\*.

ESA: a) Unidentified *Pipistrellus* sp.\*, *Scotozous* sp.\*, *Scotophilus* spp.\*, and possible *Hesperoptenus* sp.\*, b) *Myotis horsfieldii*<sup>^</sup> (Temminck), and c) unidentified *Myotis* sp.

NSFD: a) *Hipposideros pomona*<sup>^</sup> (Andersen), b) Unidentified *Hipposideros* sp. of family Hipposideridae.

A bat family we recorded but did not include in any guild was the Megadermatidae, with two species: a) *Lyroderma lyra* (Geoffroy), b) *Megaderma spasma* (Linnaeus). Activity levels of both species were found to be low.
